# Supplementary material
Source: PubMed Central journal article supplement (PMC3989697)
Supplement: embr0015-0308-sd2.pdf [file embr0015-0308-sd2.pdf]

## Supplementary Figures

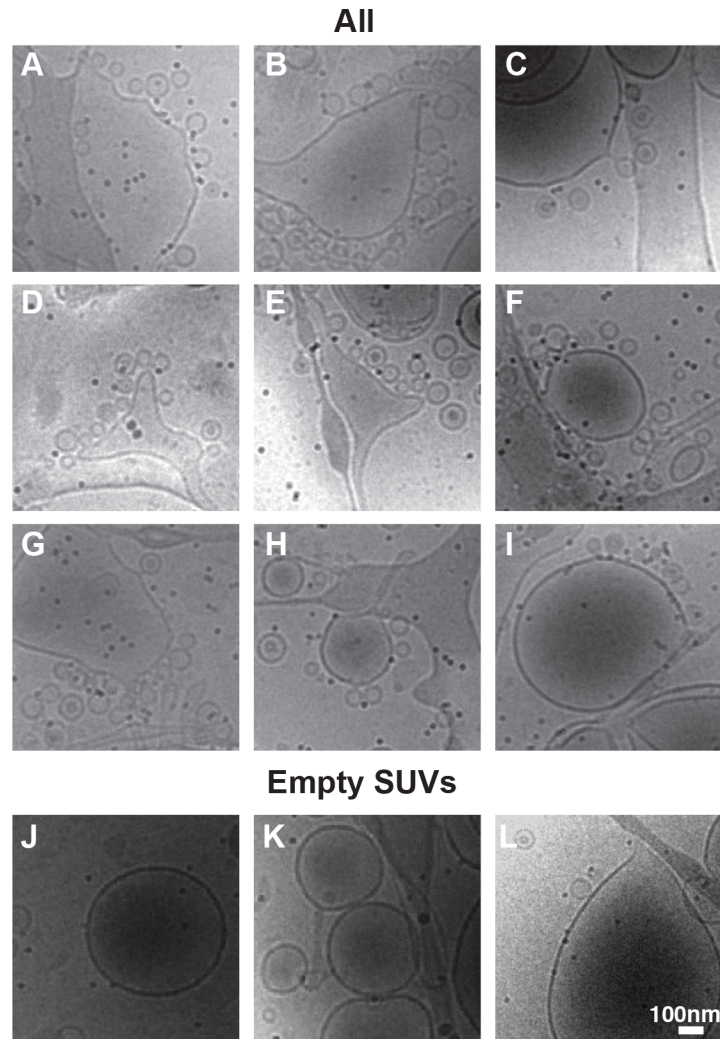

**Figure S1.** Examples of low-magnification overview cryoEM images used to assess the fraction of SUVs proximal to GUVs.

(A-I) A large fraction (68.4%) of SUVs were in close proximity to GUVs in the sample containing all proteins. (J-L) A much lower fraction of SUVs were close to GUVs (21.3%) in the control sample. These SUVs contain no proteins (neither synaptotagmin 1 nor VAMP2).
