# Supplementary material
Source: PubMed Central journal article supplement (PMC3989697)
Supplement: embr0015-0308-sd3.pdf [file embr0015-0308-sd3.pdf]

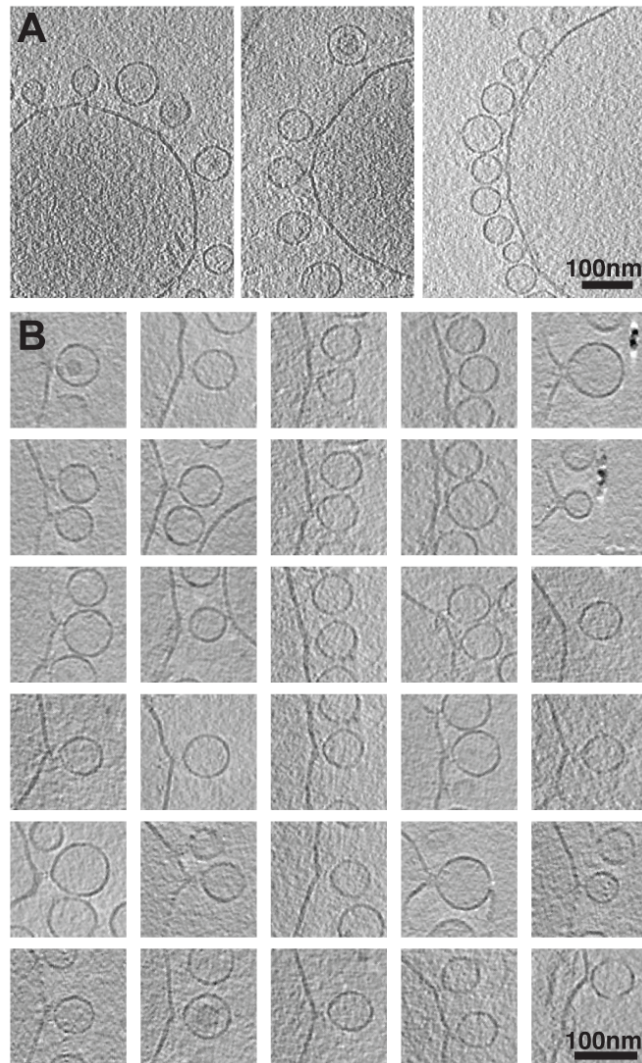

**Figure S2.** Tomographic slices showing vesicles docked onto protruding target membranes.

(A) SUVs containing VAMP-2 and synaptotagmin 1 were mixed with GUVs containing syntaxin-1A and SNAP-25 in the presence of complexin and Munc18-1. Tomographic slices (see Figure 1C) showing pools of docked vesicles on GUV membranes. (B) A gallery of slices through filtered tomograms showing representatives of the “protrusion” class of docking site membrane morphology. The degree of distortion of the target membrane differs at different docking sites.
