# Supplementary material
Source: PubMed Central journal article supplement (PMC3989697)
Supplement: embr0015-0308-sd4.pdf [file embr0015-0308-sd4.pdf]

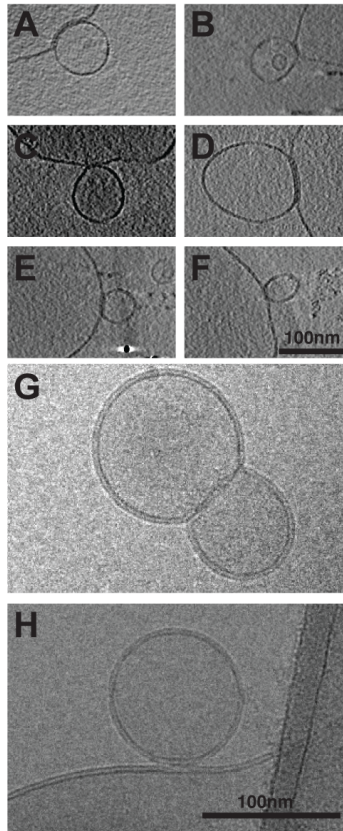

**Figure S3.** Examples of morphologies present in the control sample with empty SUVs.

(A-F) Tomographic slices showing diaphragm-like morphologies with “extended” membrane-membrane contacts seen in the control sample. This sample contains empty SUVs, so the membranes are likely pressed together. (G,H) Higher dose 2D images showing extended membrane-membrane contacts (diaphragm-like membrane morphologies) in the same sample.
