# Supplementary material
Source: PubMed Central journal article supplement (PMC3989697)
Supplement: embr0015-0308-sd6.pdf [file embr0015-0308-sd6.pdf]

## Supplementary Tables

|            | All    | Empty SUVs | +CD-VAMP2 | -VAMP2 | -Munc18-1 |
|------------|--------|------------|-----------|--------|-----------|
| All        |        | 0.0000     | 0.8630    | 0.7213 | 0.6830    |
| Empty SUVs | 0.0000 |            | 7.40e-16  | 0.0000 | 6.83e-06  |
| +CD-VAMP2  | 0.8630 | 7.40e-16   |           | 0.6832 | 0.6830    |
| -VAMP2     | 0.7213 | 0.0000     | 0.6832    |        | 0.5616    |
| -Munc18-1  | 0.6830 | 6.83e-06   | 0.6830    | 0.5616 |           |

**Table S1.** Benjamini-Hochberg-adjusted two-sided P-values from comparisons between proportions of docked (and undocked) SUVs observed in different samples (shown in Figure 2G).

The proportions of docked and undocked SUVs were counted from low-magnification montage images (see supplementary methods) from three independent biochemical experiments. The three replicates for each docked (or undocked) proportion were used to estimate their standard error using the James-Stein shrinkage estimator [35] and consequently a z-test was performed (see supplementary methods). Values highlighted in grey indicate significant tests at a false discovery rate of 5%.
