# Supplementary material
Source: PubMed Central journal article supplement (PMC3989697)
Supplement: embr0015-0308-sd7.pdf [file embr0015-0308-sd7.pdf]

|            |            | All      | Empty SUVs | +CD-VAMP2 | -VAMP2   | -Munc18-1 |
|------------|------------|----------|------------|-----------|----------|-----------|
| All        | Protrusion |          | 2.66e-04   | 1.01e-03  | 0.0000   | 0.2144    |
|            | Contact    |          | 0.7457     | 5.31e-04  | 2.66e-04 | 0.4774    |
|            | Extended   |          | 9.19e-03   | 0.4842    | 0.1012   | 0.2205    |
| Empty SUVs | Protrusion | 2.66e-04 |            | 0.0952    | 0.9101   | 2.65e-03  |
|            | Contact    | 0.7457   |            | 0.1949    | 0.1247   | 0.9721    |
|            | Extended   | 9.19e-03 |            | 0.0150    | 0.1013   | 0.0746    |
| +CD-VAMP2  | Protrusion | 1.01e-03 | 0.0952     |           | 2.73e-04 | 0.0540    |
|            | Contact    | 5.31e-04 | 0.1949     |           | 0.6062   | 2.55e-03  |
|            | Extended   | 0.4842   | 0.0150     |           | 0.1627   | 0.4774    |
| -VAMP2     | Protrusion | 0.0000   | 0.9101     | 2.73e-04  |          | 6.52e-10  |
|            | Contact    | 2.66e-04 | 0.1247     | 0.6062    |          | 1.01e-03  |
|            | Extended   | 0.1012   | 0.1013     | 0.1627    |          | 0.7020    |
| -Munc18-1  | Protrusion | 0.2144   | 2.65e-03   | 0.0540    | 6.52e-10 |           |
|            | Contact    | 0.4774   | 0.9721     | 2.55e-03  | 1.01e-03 |           |
|            | Extended   | 0.2205   | 0.0746     | 0.4774    | 0.7020   |           |

**Table S2.** Benjamini-Hochberg-adjusted two-sided P-values from comparisons between each proportion of observed membrane morphology obtained from different samples using cryoET (Figure 2G).

The proportion of ‘protrusion’, ‘contact’ and ‘extended’ membrane morphologies were counted from high-magnification tomograms (see supplementary methods) from three independent biochemical and cryoET experiments. The three replicates for each proportion were used to estimate their standard error using the James-Stein shrinkage estimator [35] and consequently a z-test was performed (see supplementary methods). Values highlighted in grey indicate significant tests at a false discovery rate of 5%.
