# Supplementary material
Source: PubMed Central journal article supplement (PMC3989697)
Supplement: embr0015-0308-sd9.pdf [file embr0015-0308-sd9.pdf]

| Sample                                         | Low-magnification two-dimensional cryoEM for docking |                                       |                        | High-magnification cryoET for membrane morphology |                                         |                                          |                     |
|------------------------------------------------|------------------------------------------------------|---------------------------------------|------------------------|---------------------------------------------------|-----------------------------------------|------------------------------------------|---------------------|
|                                                | Docked (percentage of all vesicles)                  | Undocked (percentage of all vesicles) | Total vesicles counted | Primed (percentage of docked vesicles)            | Contact (percentage of docked vesicles) | Extended (percentage of docked vesicles) | Total docking sites |
| <b>Time course 1min</b><br>(Figure 3)          | 441(62.4%)                                           | 265(37.6%)                            | 706                    | 2(2.8%)                                           | 52(73.2%)                               | 17(24.0%)                                | 71                  |
| <b>Time course 5min</b><br>(Figure 3)          | 366(78.8%)                                           | 98(21.2%)                             | 464                    | 27(30.0%)                                         | 51(56.7%)                               | 12(13.3%)                                | 90                  |
| <b>Time course 60min</b><br>(Figure 3)         | 444(88.2%)                                           | 59(11.8%)                             | 503                    | 46(38.3%)                                         | 60(50.0%)                               | 14(11.7%)                                | 120                 |
| <b>-Syt1</b>                                   | 28 (7.8%)                                            | 334 (92.2%)                           | 362                    | 2(18.2%)                                          | 6(54.5%)                                | 3(27.3%)                                 | 11                  |
| <b>SUV:SUV</b><br>(figure S4A)                 | Unable to assign                                     | Unable to assign                      | Unable to assign       | Unable to assign                                  | Unable to assign                        | Unable to assign                         | Unable to assign    |
| <b>vSNARE GUVs: tSNARE SUV</b><br>(Figure S4B) | 257(62.2%)                                           | 156 (37.8%)                           | 413                    | 2(3.4%)                                           | 54(93.1%)                               | 2(3.4%)                                  | 58                  |

**Table S3.** Effect of incubation time and initial membrane curvature on vesicle docking and membrane morphology (raw data for figures 3 and S4).

For each reaction, two randomly selected grid squares were imaged at low-magnification and the number of SUVs in close proximity to a GUV (docked) or not (undocked) were counted (see supplementary methods). At a higher magnification, 5-16 tomograms were collected for each sample and the observed docking sites were classified as a “protrusion”, a “contact” or an “extended” membrane-membrane contact site (see supplementary methods for definitions). The first three rows of this table contain raw data used for Figure 3. This quantification was performed blind. The last two rows contain raw data for Figure S4. For the SUV:SUV fusion experiment, it was not possible to assign bona-fide docking sites in either the low-magnification pictures or in high-magnification tomograms due to the similarity of the vesicle sizes.
