# Supplementary material
Source: PubMed Central journal article supplement (PMC3989697)
Supplement: embr0015-0308-sd10.pdf [file embr0015-0308-sd10.pdf]

## **Supplementary Movie Legends**

**Movie S1.** CryoET reveals pools of docked SUVs on GUV membranes.

Animation through sequential z-slices of a tomogram of the complete reaction showing pools of docked SUVs on GUV membranes.
